# Supplementary material
Source: PubMed Central journal article supplement (PMC3524658)
Supplement: TableS1.pdf [file TableS1.pdf]

| Reference                      | Generation | Age (mths) | Sex | Muscle groups                    | Muscle prep              | Mitochondrial content                        | Mitochondrial function                                                                                                                                                                                                                                            | Mitochondrial protein                                                                                             | H <sub>2</sub> O <sub>2</sub> , oxidative stress                                                                                                     |
|--------------------------------|------------|------------|-----|----------------------------------|--------------------------|----------------------------------------------|-------------------------------------------------------------------------------------------------------------------------------------------------------------------------------------------------------------------------------------------------------------------|-------------------------------------------------------------------------------------------------------------------|------------------------------------------------------------------------------------------------------------------------------------------------------|
| Wisloff <i>et al.</i> (ref 49) | 10 – 11    | 4 – 6      | M   | Sol                              | Homog                    | N/D                                          | N/D                                                                                                                                                                                                                                                               | COX1 (ComplexIV), F0F1 ATPase: HCR > LCR                                                                          | N/D                                                                                                                                                  |
| Naples <i>et al.</i> (ref 32)  | 20         | 5 – 6      | F   | RG                               | Homog, isolated mito     | <u>EM:</u><br>HCR = LCR                      | <u>Homog:</u><br>βHAD activity: HCR = LCR<br><u>Mito:</u><br>Palmitate ox ( <sup>14</sup> CO <sub>2</sub> ): HCR > LCR<br>SOD2 activity: HCR < LCR                                                                                                                | Cytochrome c: HCR > LCR                                                                                           | N/D                                                                                                                                                  |
| Rivas <i>et al.</i> (ref 38)   | 20         | 4          | F   | Whole hindlimb, RG, WG, sol, EDL | Perfused hindlimb, homog | <u>EM:</u><br>Sol: HCR = LCR<br>EDL: HCR>LCR | <u>Perfused hindlimb:</u><br>Glucose uptake and ox: HCR > LCR<br>Palmitate uptake and ox: HCR > LCR<br><u>Homog:</u><br><i>Citrate synthase activity:</i><br>RG: HCR = LCR; WG: HCR > LCR                                                                         | N/D                                                                                                               | N/D                                                                                                                                                  |
| Tweedie <i>et al.</i> (ref 46) | 21         | 14         | M   | Sol, RG                          | Fiber bundles            | N/D                                          | <i>O<sub>2</sub> consumption (state3, state 4, FCCP):</i><br>Sol: HCR > LCR; Sol/CS: HCR > LCR<br>RG: HCR = LCR; RG/CS: HCR < LCR<br><i>Citrate synthase activity:</i><br>Sol: HCR = LCR; RG: HCR > LCR<br><i>SOD2 activity:</i><br>Sol: HCR > LCR; RG: HCR = LCR | N/D                                                                                                               | <u>H<sub>2</sub>O<sub>2</sub>:</u><br>Sol: HCR > LCR<br>Sol/CS: HCR > LCR<br>RG: HCR > LCR<br>RG/CS: HCR < LCR<br><u>8-dOHG (nDNA):</u><br>HCR < LCR |
| Current study                  | 23         | 14 - 15    | F   | Whole hindlimb                   | Isolated mito            | <u>Mito yield:</u><br>HCR > LCR              | <i>O<sub>2</sub> consumption:</i><br>State3: HCR > LCR<br>State4: HCR = LCR<br>FCCP : HCR = LCR<br><i>Proton leak kinetics:</i><br>HCR = LCR                                                                                                                      | COX1 (ComplexIV), SOD2: HCR > LCR<br>GPx4, UCP3, HXII, aconitase, and subunits from complex I, II, III: HCR = LCR | <u>H<sub>2</sub>O<sub>2</sub>:</u><br>HCR > LCR<br><u>4-HNE:</u><br>HCR < LCR                                                                        |

Supplemental Table. Summary of studies comparing mitochondrial content and function in skeletal muscle from HCR and LCR rats. Abbreviations: Sol: *soleus*; RG: red *gastrocnemius*; WG: white *gastrocnemius*; EDL: *extensor digitorum longus*; Homog: muscle homogenate; Mito: mitochondria; CS: citrate synthase activity;  $\beta$ HAD:  $\beta$ -hydroxy-acyl-CoA-dehydrogenase; 8-dOHG: 8-dihydroxy-guanosine; ox: oxidation
